# Supplementary material for: Kdm5/Lid Regulates Chromosome Architecture in Meiotic Prophase I Independently of Its Histone Demethylase Activity
Source: PubMed Central journal article supplement (PMC4975413; doi:10.1371/journal.pgen.1006241), 2016-08-05
Supplement: pgen.1006241.s003.pdf [file pgen.1006241.s003.pdf]

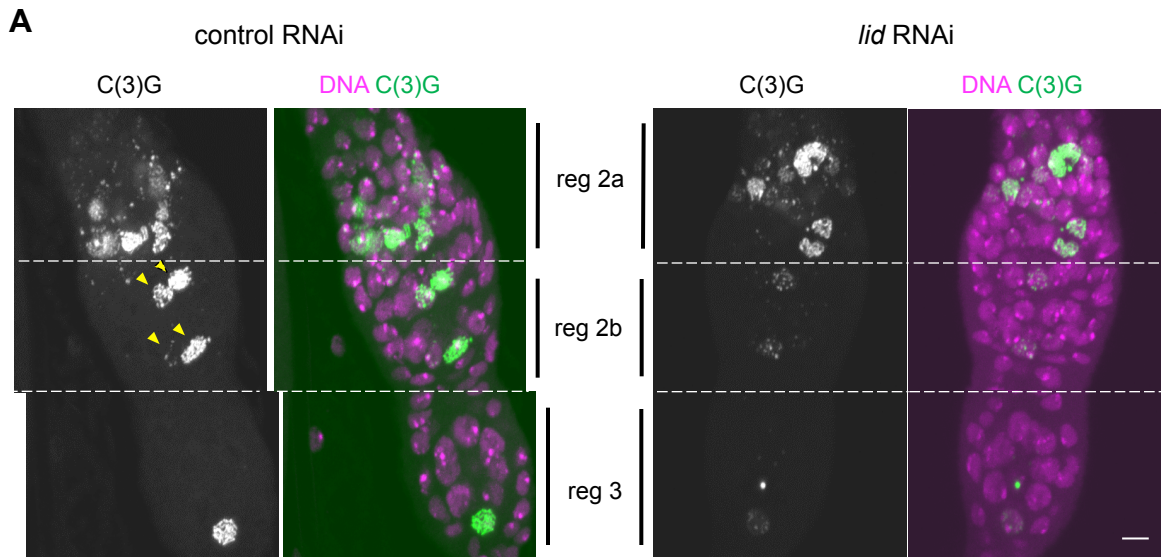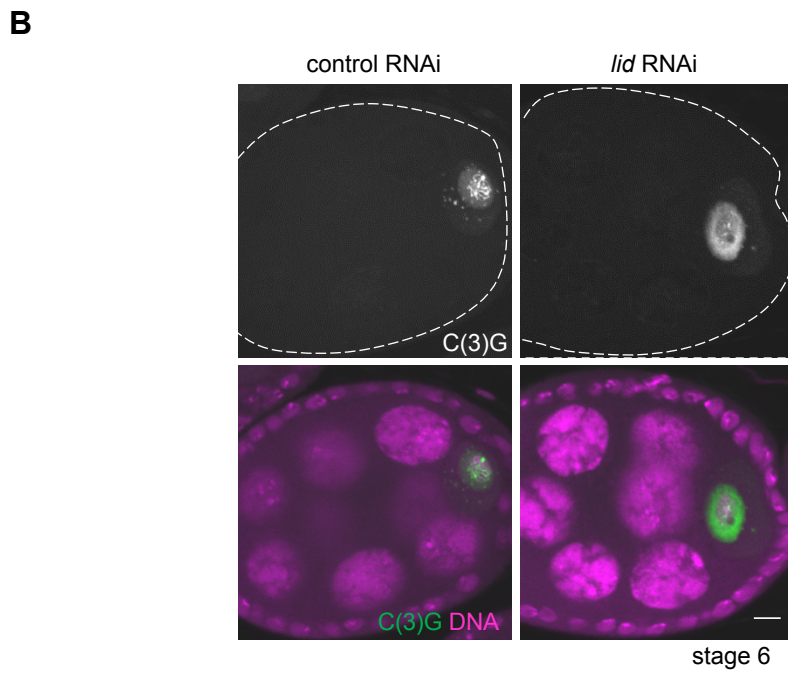

S3 Figure
