# Supplementary material for: Kdm5/Lid Regulates Chromosome Architecture in Meiotic Prophase I Independently of Its Histone Demethylase Activity
Source: PubMed Central journal article supplement (PMC4975413; doi:10.1371/journal.pgen.1006241), 2016-08-05
Supplement: pgen.1006241.s005.pdf [file pgen.1006241.s005.pdf]

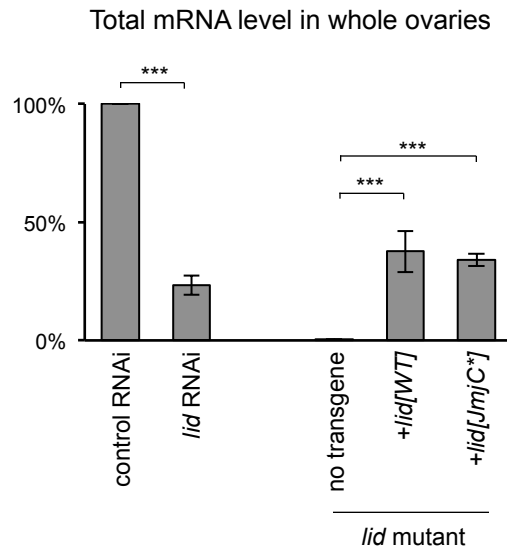

S5 Figure
